# Supplementary material for: Chirality effects on core-periphery connection in a star-burst type tetranuclear Ru(iii) complex: application of vibrational circular dichroism spectroscopy
Source: Royal Society of Chemistry journal article supplement (doi:10.1039/c1dt11510c), 2011-10-18
Supplement: c1dt11510c.pdf [file c1dt11510c.pdf]

## Supporting Information

### Chirality Effects on Core-periphery Connection in a Star-burst Type Tetranuclear Ru(III) Complex: Application of Vibrational Circular Dichroism Spectroscopy

Hisako Sato,<sup>\*a</sup> Fumi Sato<sup>b</sup>, Masahiro Taniguchi<sup>c</sup> and Akihiko Yamagishi<sup>b</sup>

<sup>1</sup>Graduate School of Science and Engineering, Ehime University, Matsuyama, Ehime 790-8577

<sup>2</sup>Department of Medicine, Toho University, Oomori, Tokyo 143-8540

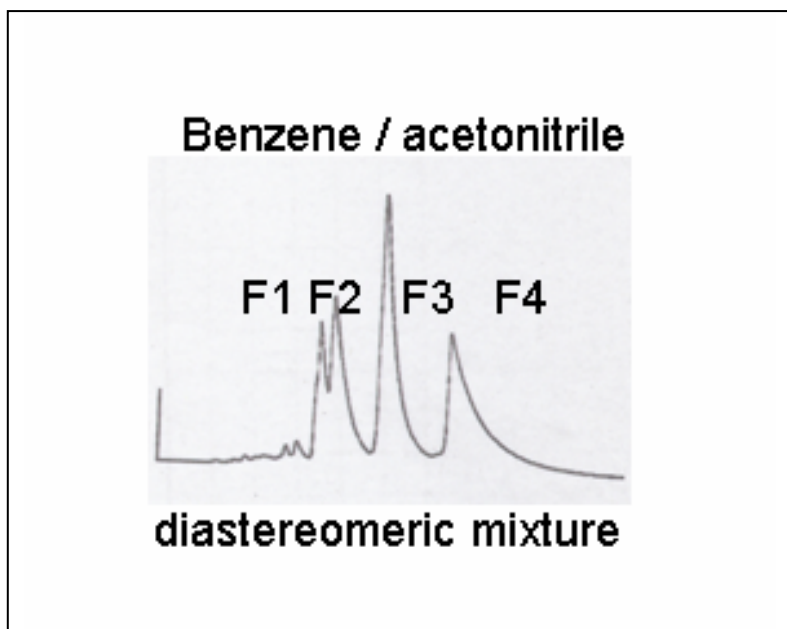

Figure S1. The HPLC chromatogram when a diastereomeric mixture of tetranuclear Ru(III) complexes was eluted on a silica gel column. The eluting solvent was 1:1 (v/v) acetonitrile/benzene. Four main peaks were separated. They are denoted by F1, F2, F3 and F4, respectively.

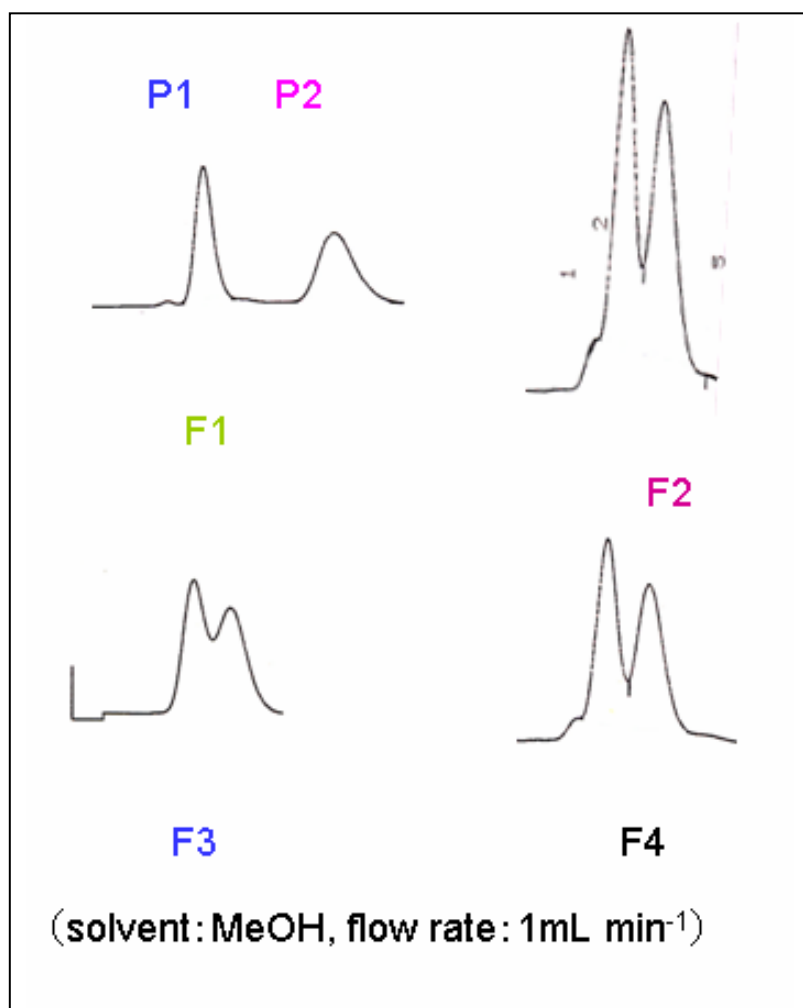

Figure S2. The HPLC chromatogram when each diastereomer of tetranuclear Ru(III) complex was eluted on a chiral column. The eluting solvent was 1:1 (v/v) methanol/chloroform. In all cases, two main peaks were separated. They are denoted by P1 and P2, respectively. The used column was a column packed with an ion-exchange adduct of a clay and chiral tris(phenanthroline)ruthenium(II) complexes.

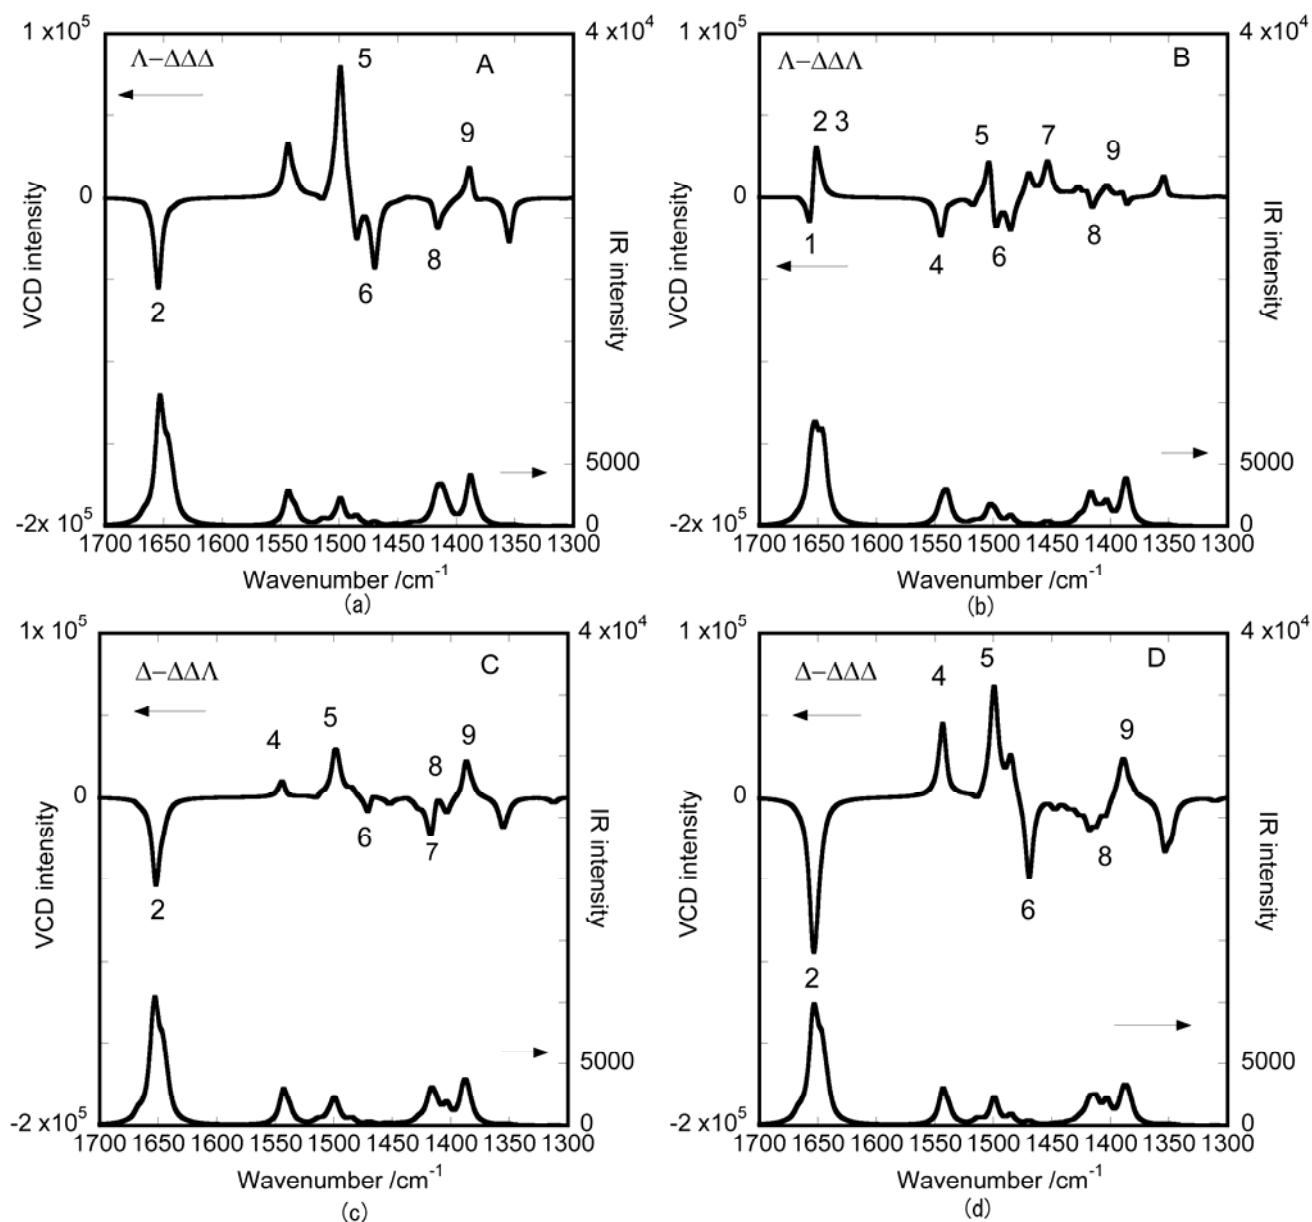

Figure S3. The calculated IR and VCD spectra of the enantiomers of tetranuclear Ru(III) complexes. The enantiomers were the P2 fractions of A, B, C and D-types as shown in Figure S2. For the calculation, all CH<sub>3</sub> groups were replaced with H atoms for the sake of reducing calculation time.

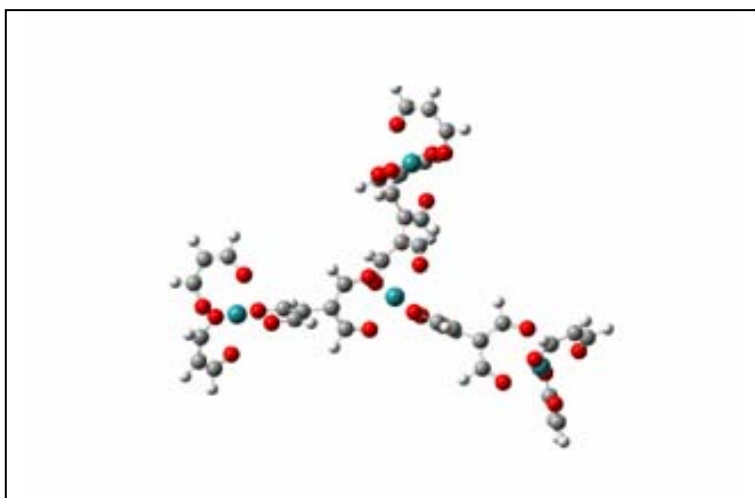

Figure S4. The optimized calculated structure of B-type ( $\Lambda$ - $\Delta\Delta\Lambda$ ) tetranuclear Ru(III) complex
